# Supplementary material
Source: HighWire-hosted journal article supplement (https://www.highwirestage.com/highwire/filestream/94224/field_highwire_adjunct_files/0/0210.pdf)
Supplement: 0210.pdf [file 0210.pdf]

# Comparison of hippocampal subfields segmentation agreement between two automated protocols across the adult lifespan

## Online Supplemental Data

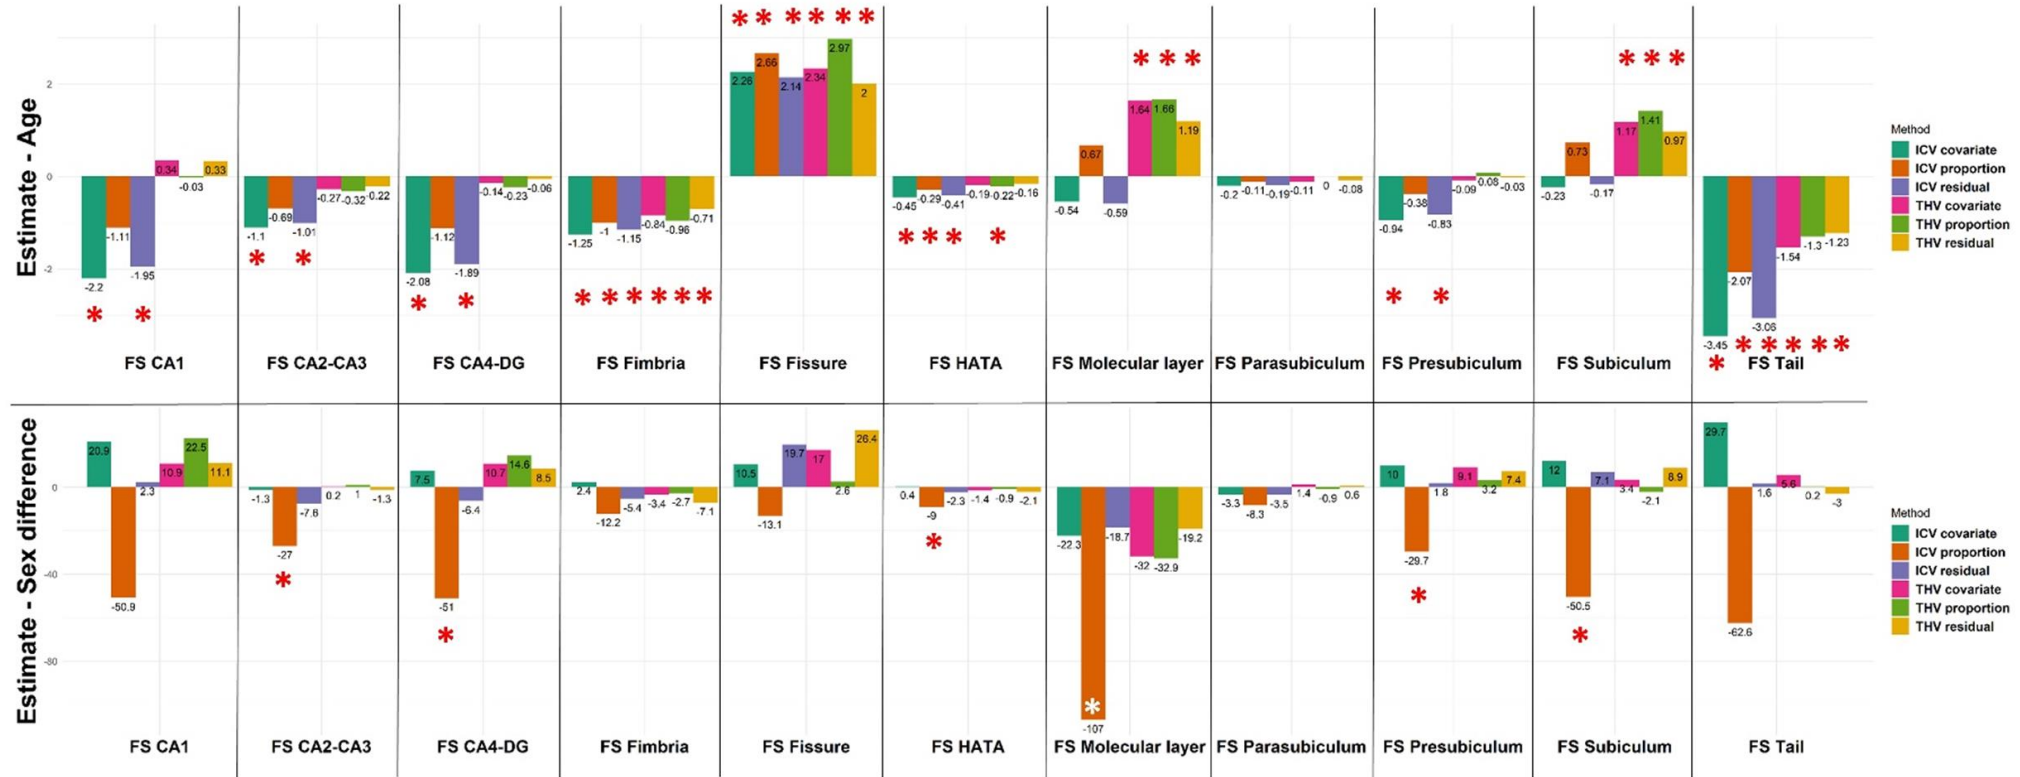

**Supplemental Figure 1:** Regression estimates ( $\beta$  values) of the relationship between age (*top panel*) and sex (*bottom panel*) with FreeSurfer hippocampal subfield volumes applying various ICV and THV normalization methods (covariate, proportion, and residual). Positive estimates in the sex comparison indicate higher subfield volumes in men, while negative estimates indicate higher subfield volumes in women. \*, indicate statistically significance corrected for multiple comparisons ( $p < 0.0045$ ). CA, cornu ammonis; DG, dentate gyrus; HATA, hippocampus-amygdala transition area; ICV, intracranial volume; THV, total hippocampal volume.

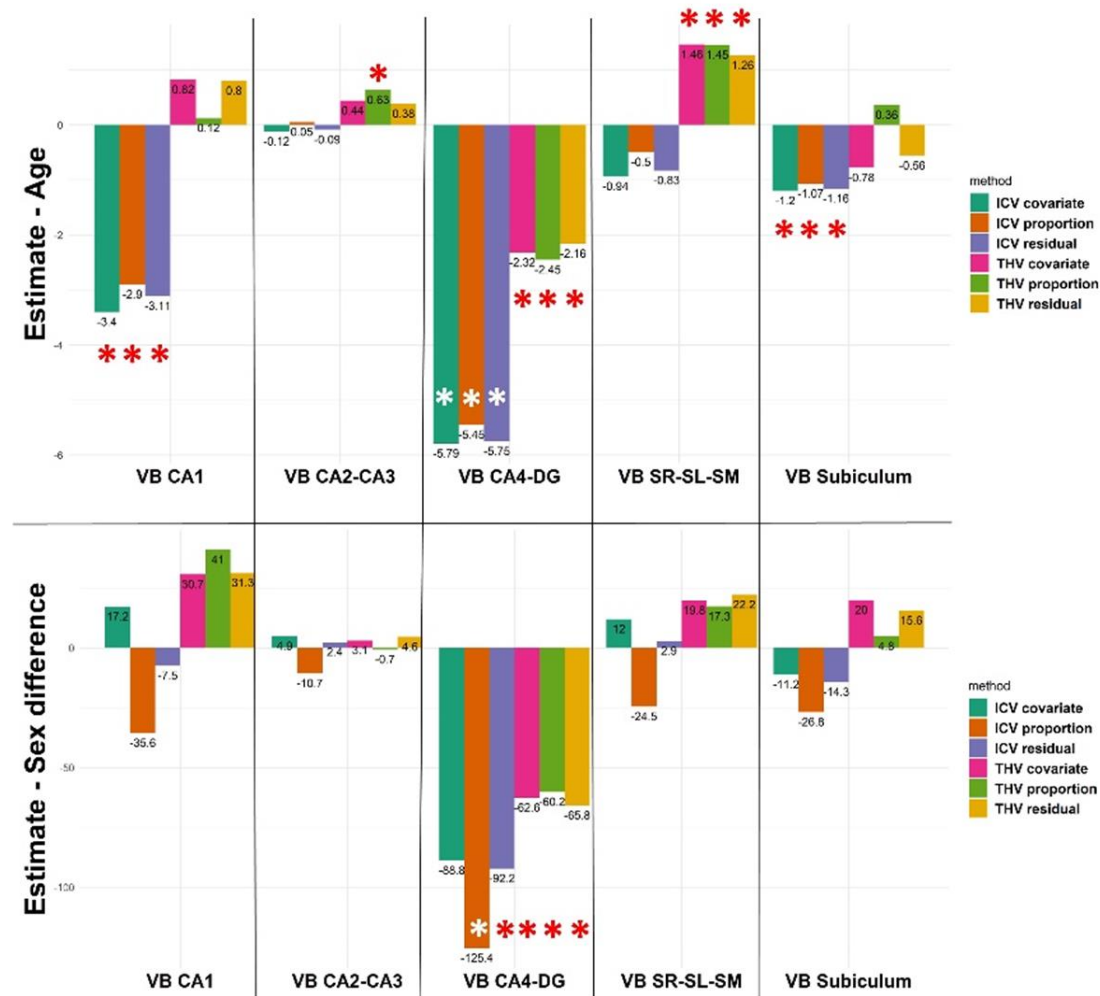

**Supplemental Figure 2:** Regression estimates ( $\beta$  values) of the relationship between age (top panel) and sex (bottom panel) with volBrain hippocampal subfield volumes applying various ICV and THV normalization methods (covariate, proportion, and residual). Positive estimates in the sex comparison indicate higher subfield volumes in men, while negative estimates indicate higher subfield volumes in women. \*, indicate statistically significance corrected for multiple comparisons ( $p < 0.01$ ). CA, cornu ammonis; DG, dentate gyrus; SR-SL-SM, strata radiatum-lacunosum-moleculare; ICV, intracranial volume; THV, total hippocampal volume.
